# Supplementary material for: Zinc2+ ion inhibits SARS-CoV-2 main protease and viral replication in vitro
Source: bioRxiv or medRxiv preprint supplement (doi:10.1101/2021.06.15.448551), 2021-07-13
Supplement: Supplementary file [file media-1.pdf]

## Supplementary Information

**Title:** Zinc<sup>2+</sup> ion inhibits SARS-CoV-2 main protease and viral replication *in vitro*.

**Authors:** Love Panchariya<sup>1†</sup>, Wajahat Ali Khan<sup>1†</sup>, Shobhan Kuila<sup>1†</sup>, Kirtishila Sonkar<sup>1</sup>, Sibasis Sahoo<sup>1</sup>, Archita Ghoshal<sup>1</sup>, Ankit Kumar<sup>2</sup>, Dileep Kumar Verma<sup>2</sup>, Abdul Hasan<sup>2</sup>, Shubhashis Das<sup>3</sup>, Jitendra K Thakur<sup>3</sup>, Rajkumar Halder<sup>4</sup>, Sujatha Sunil<sup>2</sup>, Arulandu Arockiasamy<sup>1\*</sup>

### **Affiliation:**

<sup>1</sup>Membrane Protein Biology Group, International Centre for Genetic Engineering and Biotechnology, Aruna Asaf Ali Marg, New Delhi-110067. India.

<sup>2</sup>Vector Borne Diseases Group, International Centre for Genetic Engineering and Biotechnology, Aruna Asaf Ali Marg, New Delhi-110067. India.

<sup>3</sup>Plant Mediator Lab, National Institute of Plant Genome Research, Aruna Asaf Ali Marg, New Delhi- 110 067

<sup>4</sup>Ruhvenile Biomedical OPC PVT LTD, Plot No-8, OCF Pocket Institution, Sarita Vihar, New Delhi-110070. India.

<sup>†</sup>These authors contributed equally to the work presented.

For correspondence:

\*Correspondence should be addressed to: [sam@icgeb.res.in](mailto:sam@icgeb.res.in) / [asamy001@gmail.com](mailto:asamy001@gmail.com)

Communicating author:

Arockiasamy Arulandu

International Centre for Genetic Engineering and Biotechnology (ICGEB),

Aruna Asaf Ali Marg,

New Delhi 110067. India.

Phone: +91-11-26741358 Ext-172

Fax: +91-11-26742316

Mobile: +91-9711055502

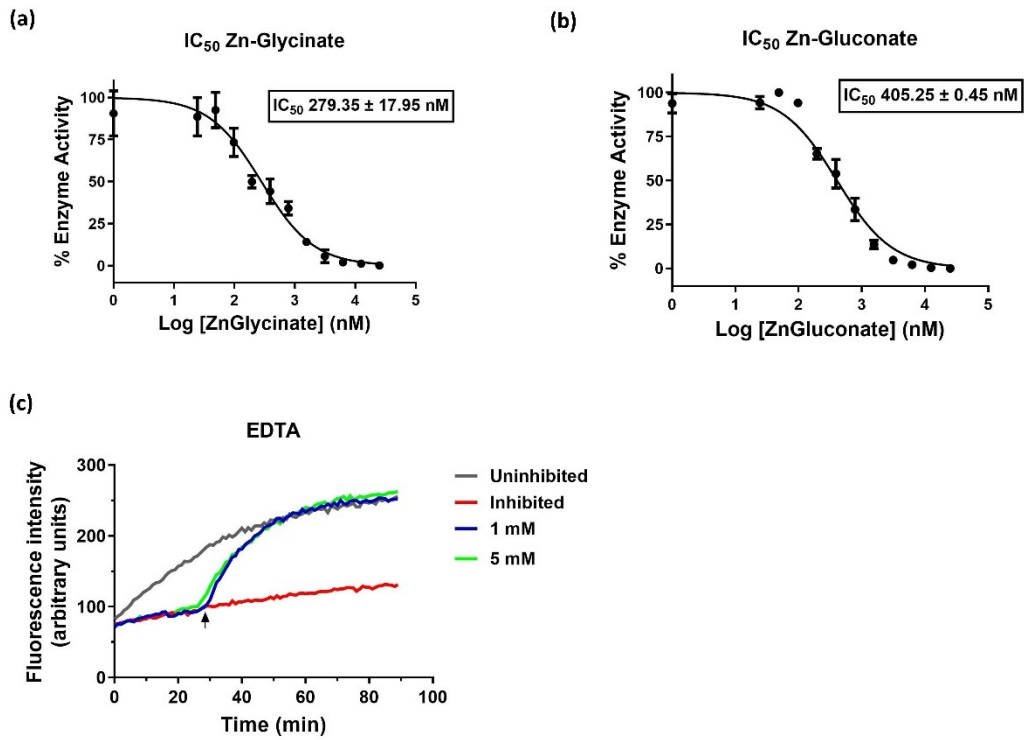

26

27

28 **Supplementary Figure 1. Mpro Inhibition by Zn-complexes.** IC<sub>50</sub> and concentration  
 29 dependent inhibition of Mpro by zinc-Glycinate (a) and Zinc-Gluconate (b), respectively. (c)  
 30 Inhibition with 500 nM Zinc acetate was completely reversed by the addition of 1 and 5 mM of  
 31 EDTA at the 28<sup>th</sup> minute of the ongoing enzymatic reaction.

32

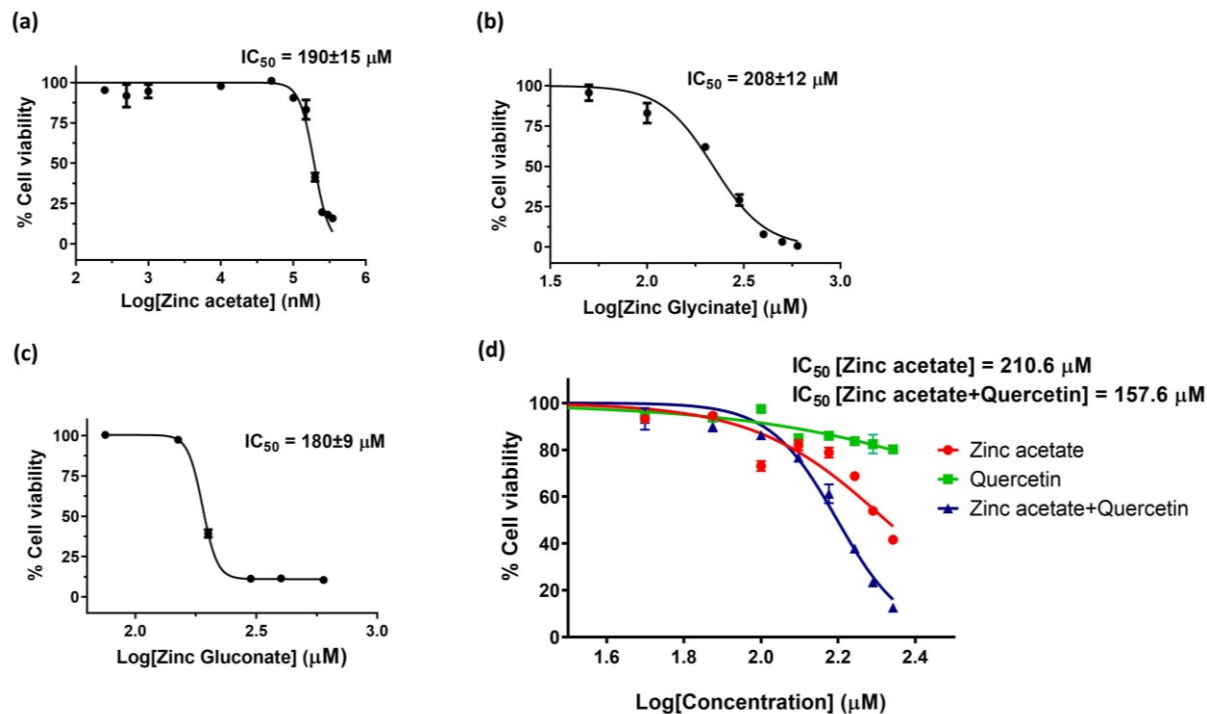

33  
 34 **Supplementary Figure 2. Toxicity determination of Zinc and its complexes in Vero E6 cells.**  
 35 Non-toxic concentrations were determined by studying the effect of Zinc acetate (a), Zinc  
 36 glycinate (b), and Zinc gluconate (c) on the proliferation of Vero E6 cells after 48 h post  
 37 addition, as determined by MTT assays. (d) Non-toxic concentrations for Zinc acetate and  
 38 quercetin (1:1 molar mixture, blue) is compared with Zinc acetate alone (red). IC<sub>50</sub> for quercetin  
 39 alone (green) could not be determined. All experiments are done in biological triplicates.

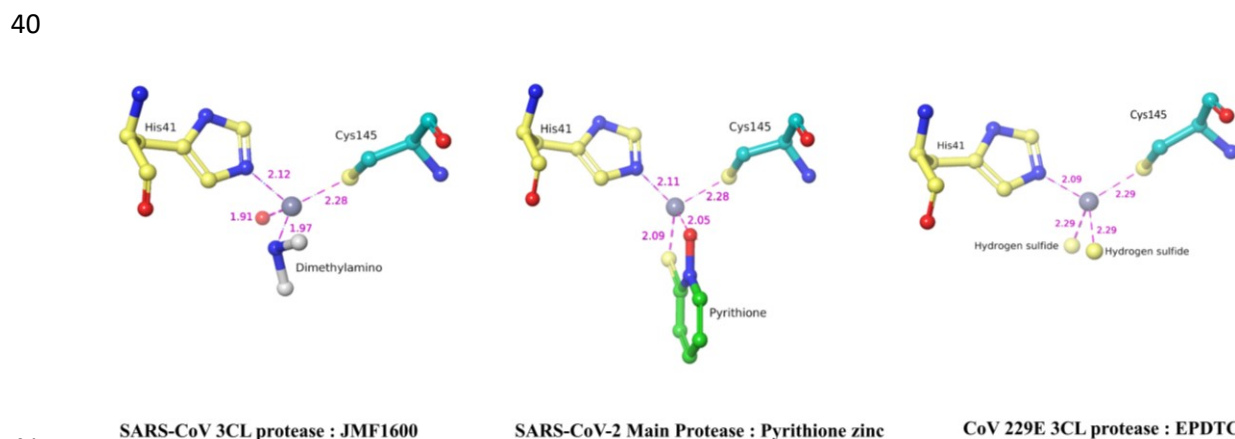

42 **Supplementary Figure 3: Metal ion coordination of Zinc-complexes bound to coronavirus**  
 43 **3C-like proteases.** Ball and stick model representation of 3CL-pro-Zn complex crystal  
 44 structures; SARS-CoV-Mpro-JMF1600 (PDB: 2Z9K), SARS-CoV-2-Mpro-Zn-pyrithione (PDB:  
 45 7B83) and HCoV-229E-3CLpro-N-ethyl-n-phenyl-dithiocarbamic acid (EPDTC) (PDB: 2ZU2).  
 46 Zinc is depicted as grey ball. Interatomic distances are represented as dotted lines with bond  
 47 distance in angstrom (Å).

| Experiment | ka (1/Ms) | kd (1/s)       | KD (M)                 | Rmax (RU)  | Chi <sup>2</sup> (RU <sup>2</sup> ) | U-value |
|------------|-----------|----------------|------------------------|------------|-------------------------------------|---------|
| 1          | 8960      | 0.01745        | 1.95E-06               | 57.32      | 3.39                                | 2       |
| 2          | 8899      | 0.01765        | 1.98E-06               | 57.58      | 3.36                                | 3       |
| Median     | 8,930±30  | 0.01755±1<br>0 | 1.965E-06<br>±0.15E-07 | 57.45±0.13 | 3.375±0.015                         | 2.5±0.5 |

48

49 **Supplementary Table 1. Binding kinetics of Zinc<sup>2+</sup> and SARS-CoV-2 Mpro.** Using 1:1  
50 binding model, association [ka (1/Ms)] and dissociation [KD (1/s)] rate constants, and affinity  
51 [KD (M)] are shown. The goodness of fit (Chi<sup>2</sup> = 3.375±0.015) is within the suggested 10% of  
52 the Rmax (57.45±0.13). U-values of 2 and 3 reflect 98 and 97% confidence in KD value  
53 respectively. The affinity (KD) of Zinc<sup>2+</sup> for Mpro is ~2 μM. The experiment was repeated twice  
54 to get the median KD of 1.96 μM.

55

|                                                     | <b>Mpro-Zn (PDB:7DK1)</b> | <b>Mpro-Apo (control)</b> |
|-----------------------------------------------------|---------------------------|---------------------------|
| <b>Data collection</b>                              |                           |                           |
| Space group                                         | P 21 21 21                | P 21 21 21                |
| Cell dimensions                                     |                           |                           |
| <i>a, b, c</i> (Å)                                  | 67.6, 102.2, 102.3        | 67.7, 100.7, 104.0        |
| $\alpha, \beta, \gamma$ (°)                         | 90, 90, 90                | 90, 90, 90                |
| <i>R</i> <sub>merge</sub>                           | 0.09                      | 0.086                     |
| Resolution (Å)                                      | 72.32 – 1.90              | 56.79 – 1.81              |
| <i>I</i> / $\sigma I$                               | 2.69 (1.9)                | 2.44 (1.8)                |
| Completeness (%)                                    | 100.0                     | 100.0                     |
| Redundancy                                          | 12.8                      | 12.8                      |
| <b>Refinement</b>                                   |                           |                           |
| Resolution (Å)                                      | 72.32 – 1.90              | 56.79 – 1.81              |
| No. reflections                                     | 56,431                    | 66,014                    |
| <i>R</i> <sub>work</sub> / <i>R</i> <sub>free</sub> | 0.191/ 0.213              | 0.187/0.216               |
| No. atoms                                           |                           |                           |
| Protein                                             | 4,582                     | 4,649                     |
| Ligand/ion                                          | 40                        | 38                        |
| Water                                               | 423                       | 617                       |
| <i>B</i> -factors                                   |                           |                           |
| Protein                                             | 32.4                      | 29.4                      |
| Zinc ion                                            | 40.75                     | -                         |
| R.m.s. deviations                                   |                           |                           |
| Bond lengths (Å)                                    | 0.41                      | 0.39                      |
| Bond angles (°)                                     | 0.58                      | 0.58                      |

56

57 **Supplementary Table 2. X-ray data processing and refinement statistics.** The data given is  
58 for SARS-CoV-2 Apo-Mpro and Mpro-Zn complex crystals, both crystallized in the same  
59 condition.

60

61 **Materials and methods:**

62 **SARS-CoV-2 Mpro purification:** *E. coli* overexpression plasmid pGEX-6p-1 containing  
63 SARS-CoV-2 Mpro was a kind gift from Rolf Hilgenfeld, Institute of Biochemistry, University  
64 of Lübeck, Lübeck, Germany <sup>1,2</sup>. The procured construct is designed to generate authentic N  
65 terminus by auto-proteolytic cleavage via Mpro at the cleavage-site SAVLQ↓SGFRK (arrow  
66 represents the cleavage site). Authentic C-terminus was generated by cleaving the C-terminus 6X  
67 His-tag at SGVTFQ↓GP by HRV3C protease.

68

69 Overexpression and protein purification were performed according to a previous report<sup>2</sup> with  
70 some modifications. Expression plasmid was transformed into *E. coli* BL21 (DE3). Transformed  
71 cells were inoculated into 200 mL LB media (Luria Bertani Broth, Miller, Himedia)  
72 supplemented with ampicillin (100 µg/mL) and grown at 37 °C for 3 h at 100 RPM. The primary  
73 culture was used to inoculate 6 L of LB media supplemented with ampicillin and induced with  
74 0.5 mM of isopropyl-D-thiogalactoside (IPTG) after OD<sub>600</sub> reached 0.8 at 37 °C. 5 h post  
75 induction at 37 °C, cells were harvested by centrifugation at 4000 RPM for 20 min at 4 °C and  
76 stored at -20 °C until further use. The frozen cell pellet was resuspended in lysis buffer (20 mM  
77 Tris, 150 mM NaCl, 10 mM imidazole, 10 µg/ml DNase-I, 100 µg/ml Lysozyme, pH 7.8) and  
78 subjected to lysis by sonication on ice, followed by centrifugation at 13000 RPM for 50 min at 4  
79 °C. The supernatant was loaded onto serially connected 2x 5ml HisTrap FF columns (GE) at 0.5  
80 ml/min flow rate, pre-equilibrated with buffer A (20 mM Tris, 150 mM NaCl, 10 mM Imidazole  
81 pH 7.8). Non-specifically bound proteins were removed by washing with 5 column volumes  
82 (CV) of buffer A. The bound proteins were eluted using buffer B (20 mM Tris, 150 mM NaCl,  
83 500 mM imidazole, pH 7.8) with a linear gradient of 10 to 500 mM imidazole. Fractions  
84 containing Mpro were pooled and concentration was estimated using OD<sub>280</sub><sup>3</sup>. At this stage,  
85 many contaminant proteins were observed. To cleave the C-terminal His-tag, HRV3C<sup>4</sup> protease  
86 was mixed with SARS-CoV-2 Mpro in 1:5 ratio (mg/mg) and dialysed into buffer C (20 mM  
87 Tris, 150 mM NaCl, 1 mM DTT, pH 7.8) overnight at 4 °C. This was followed by one more  
88 round of dialysis for 6 h in buffer A to remove DTT. Dialysed and tag-cleaved protein was  
89 passed through serially connected 2x 5ml HisTrap FF columns. Flow through containing  
90 enriched Mpro was collected and buffer exchanged with buffer D (20 mM Tris, 1 mM DTT, pH

91 8.0) using a HiPrep 26/10 desalting column (GE). Desalted protein was loaded onto 5 ml HiTrap  
92 Q HP column (GE) pre-equilibrated with buffer D, and eluted using a linear gradient of 0 to 500  
93 mM NaCl in 20 CV of buffer E (20 mM Tris, 1 M NaCl, 1 mM DTT, pH 8.0). Fractions  
94 containing pure Mpro were pooled, concentrated and further purified with gel filtration  
95 chromatography using pre-equilibrated HiLoad 16/600 Superdex 75 pg column with buffer C at  
96 a flow rate of 1 ml/min. Purified protein was concentrated to 27.5 mg/ml, aliquoted and flash  
97 frozen in liquid nitrogen and stored at -80 °C until further use.

98 **Surface Plasmon Resonance (SPR):** Experiments were performed using Biacore T200 with  
99 control software V2.0 and Evaluation Software V3.1 (GE Life Sciences). All measurements  
100 were made at 25 °C. Running buffer consisted of HBS-N pH 7.4 (10 mM HEPES, 150 mM  
101 NaCl, pH adjusted with NaOH). Purified Mpro was immobilized onto a CM5 chip using amine  
102 coupling method according to manufacturer's protocols with 420 s of surface activation with  
103 freshly prepared 1:1 mixture of 1-ethyl-3-(3-dimethylaminopropyl) carbodiimide hydrochloride  
104 (EDC) and N-hydroxysuccinimide (NHS) followed by 420 s contact time for the protein over the  
105 activated surface at a flow rate of 10 µl/min. The protein (50 µg/ml) was immobilized onto the  
106 chip surface in 10 mM acetate buffer pH 4.0 achieving an RU of ~14000. The remaining  
107 activated carboxy methyl groups on the surface were blocked by an injection of 1 M-  
108 ethanolamine-HCl pH 8.5 for 7 min. An unmodified flow cell surface was used as a reference for  
109 each analysis to check for the non-specific binding response to dextran matrix. Running buffer  
110 containing varying concentrations of Zinc acetate; 156 nM to 10 µM, were prepared and passed  
111 over the immobilized protein at a constant flow rate of 30 µL/min. The interaction (association  
112 time 60 s and dissociation time 120 s) between the protein and the analyte resulted in  
113 characteristic sensorgrams which were then analysed using Biacore T200 evaluation software;  
114 responses generated from unmodified surface were subtracted from the same. The curves  
115 (sensorgrams) were fitted using 1:1 model to get the association rate [ka (1/Ms)], dissociation  
116 rate [kd (1/s)], and equilibrium dissociation constant [KD (M)] for the interaction. The  
117 regeneration was done using 50 mM NaOH, 1 M NaCl solution with 30 s contact time at 30  
118 µL/min flow rate. The experiments were repeated twice to get the median values.

119

120 **Mpro enzyme inhibition assay:** Inhibitory roles of Zinc<sup>2+</sup> on enzyme activity were tested via  
121 FRET-based enzyme assay<sup>5</sup>. Fluorogenic peptide substrate (Dabcyl)-KTSAVLQ↓SGFRKM-E  
122 (Edans)-NH<sub>2</sub>; (GL Biochem) contains the cleavage site of SARS-COV-2 Mpro (cleavage site  
123 represented by ↓). Cleavage of the peptide is marked with an increase in fluorescence from  
124 EDANS, which was monitored with microplate reader (Spectramax M3, Molecular devices) at  
125 360 nm excitation and 460 nm emission wavelengths.

126 As DTT chelates Zinc ions, SARS-COV-2 Mpro was buffer exchanged into reaction buffer (20  
127 mM Tris, 100 mM NaCl, 0.5 mM TCEP, pH 7.3) using PD SpinTrap G-25 column (GE) to  
128 remove DTT. 5 μL of Mpro at a final concentration of 200 nM was added to 35 μL pre pipetted  
129 reaction buffer in a black 96 well plate. For IC<sub>50</sub> calculation, 5 μL inhibitor at concentrations  
130 ranging from 25 μM to 12.2 nM (2-fold serial dilution), was added to the protein-containing  
131 reaction mixture and incubated at 25°C for 30 min with gentle shaking. The reaction was started  
132 by adding 5 μL substrate at a final concentration of 20 μM, immediately after which the relative  
133 fluorescence was read for 45 min. The total reaction volume was 50 μL. Data were normalized  
134 by considering negative control (protein heat inactivated at 60° C for 5 min) as 100% inhibition  
135 while treating positive control as 0% inhibition.

136 To test reversibility of Zinc<sup>2+</sup> inhibition, 200 nM protein was first incubated with 500 nM zinc  
137 acetate for 30 min at 25° C with gentle shaking as described above. The reaction was then  
138 initiated with 20 μM substrate. 1 and 5 mM EDTA were added in separate wells at 28<sup>th</sup> minute  
139 when the reading was being taken.

140

141 **SARS-CoV-2 Mpro crystallization and soaking with Zinc:** Purified protein was diluted to  
142 13.6 mg/ml for crystallization in buffer C. Several flower-like multi-crystals were obtained after  
143 overnight incubation at 20° C in the reservoir solution containing 100 mM Bis-Tris, 20% PEG  
144 3350 and 5% DMSO pH 6.5<sup>6</sup>. These multi-crystals were used to prepare seeds using seed beads  
145 (Hampton research). Seeding was done into 3 μL protein: reservoir (2:1) drop in a 24 well sitting  
146 drop plate (Hampton research). Thereafter, single crystals with thin plate-like morphology were  
147 obtained after overnight incubation. Reservoir containing 10 mM Zinc glycinate or Zinc  
148 gluconate (TCI chemicals #G0215 and #G0277, respectively) was added to wells containing  
149 good quality crystals and soaked for 4 h. Crystals were then fished out and cryo-protected in a



150 solution containing the reservoir with 20% glycerol. Subsequently, crystals were immediately  
151 flash-frozen into liquid nitrogen and stored for further X-ray diffraction and data collection.  
152 Multiple attempts to co-crystallize with zinc salts failed due to heavy precipitation of the protein.  
153 Also, soaking solutions containing Zinc<sup>2+</sup> such as Zinc acetate or Zinc sulphate deteriorated the  
154 crystal quality.

155

156 **X-ray data collection, processing and refinement:** X-ray diffraction data for Zinc-soaked  
157 SARS-CoV-2 Mpro crystals were collected at XRD2 beamline<sup>7</sup>, Elettra Sincrotrone Trieste at  
158 0.99Å wavelength on a Dectris Pilatus 6M detector. Collected data were processed with  
159 autoPROC<sup>8</sup> and structure was determined by molecular replacement using Phaser-MR of Phenix  
160 crystallographic suite<sup>9</sup> using 6Y2F as search template. Initial model building was done with  
161 AutoBuild<sup>10</sup> module. Structure and map quality were further improved by manual building with  
162 Coot<sup>11</sup> and refinement with autoBUSTER<sup>12</sup>. Refinement statistics are summarised in  
163 Supplementary Table 2. Final model has R<sub>work</sub> and R<sub>free</sub> of 0.19 and 0.21 respectively. The  
164 structure has no Ramachandran outliers and 0.8 % side chain outliers. Figures were made with  
165 UCSF Chimera<sup>13</sup> and Maestro, Schrodinger suite<sup>14</sup> (Licenced to ICGEB).

166

167 **Molecular Dynamics:** Crystal structure of SARS-CoV-2 Mpro with Zinc (PDB: 7DK1) was  
168 prepared with protein preparation wizard of Schrodinger suite. Protonation states at pH 7.4±0.5  
169 were created for the complex, explicit hydrogens were added to the structure, and zero bond  
170 order was created for Zinc<sup>2+</sup> ion. Hydrogen bond optimization was done with ProtAssign and  
171 finally restrained minimization was performed using OPLS3e force field to obtain input structure  
172 for further calculations and analysis before performing Molecular Dynamic (MD) simulations.

173 To analyse the stability of the SARS-CoV-2 Mpro-Zinc complex, a 1 µs MD simulation was  
174 performed using Desmond<sup>15</sup> (Schrodinger) and the coordinates were saved at an interval of 50  
175 ps. Simulation system was built using OPLS3e force field and solvated with TIP3P water model.  
176 Orthorhombic box with an edge length of 10 Å was set, ensuring a minimal distance between the  
177 atoms of protein complex and edge of the box. Counter ions were added to neutralize the system;  
178 further, 0.15 M NaCl was added to the solvated box as salt. The prepared systems were relaxed

179 before the actual simulation by a series of energy minimization and short MD simulations, which  
180 mainly comprise of six relaxation steps while keeping the solute restrained. Briefly, in the first  
181 two steps, systems were relaxed with Brownian Dynamics NVT at T=10 K for 100 ps and 12 ps  
182 respectively. In step 3 and 4, NPT equilibration was done for 12 ps at 10 K with restrains on  
183 heavy solute atoms. At step 5, the pocket was solvated. Finally, in step 6 and 7 short NPT  
184 equilibrations were done for 12 and 24 ps respectively. The NPT ensemble was employed for the  
185 simulations with Nose-Hover chain thermostat and the Maryna-Tobias-Klein barostat. RESPA  
186 integrate was used with a time step of 2 fs. For short range of coulombic interactions, a 9 Å cut  
187 off was considered. Analysis of the simulation was done with simulation event analysis,  
188 Desmond.

189

190 **Cell culture and virus strain:** Vero E6 cells (African green monkey kidney cells) were  
191 purchased from ATCC, grown and maintained in Minimal Essential Media (MEM; HIMEDIA;  
192 AL047S) supplemented with 10 % FBS (HIMEDIA, RM10681), 2 mM L-Glutamine  
193 (HIMEDIA; TCL012), 100 U/ml penicillin, and 10 mg/ml streptomycin, in a 5 % carbon dioxide  
194 incubator with controlled humidity at 37 °C. For antiviral studies, SARS-CoV-2 strain, USA-  
195 WA1/2020 was used. All the virus infection and subsequent experiments using virus were  
196 performed in BSL-3 (virology) facility at ICGEB, New Delhi.

197

198 **Cell viability assay:** Cytotoxicity of Zinc acetate, Zinc glycinate, and Zinc gluconate on the  
199 viability and proliferation of the Vero E6 cells was evaluated using MTT assay. Cells were  
200 seeded at a density of 7000 cells per well in a 96-well plate. After allowing the cells to attach  
201 overnight, they were treated with varying concentrations of the above compounds. Treatment  
202 was done in MEM supplemented with 2% FBS for 48 h, at the end of which MTT assay was  
203 performed as per manufacturer's protocol. GraphPad Prism software was used to determine the  
204 IC<sub>50</sub> (50% inhibitory concentration). The absorbance (A) was measured at 570 nm and the  
205 percentage cell viability was calculated using the following formula:

206  $\text{Percentage cell viability} = (A_{570} \text{ of treated}) / A_{570} \text{ of Untreated} * 100$

207

208 **Anti-SARS-CoV-2 assay:** Anti-viral assays with Zinc acetate, Zinc gluconate, Zinc glycinate  
209 and Zinc acetate: quercetin mixture (1:2 molar ratio) were performed using a standard assay  
210 reported for SARS-CoV-2 and other viruses<sup>16,17</sup>. Vero E6 cells were seeded in 24-well plates, a  
211 day prior to infection. The following day, Zinc and other compounds were added to these seeded  
212 cells at maximum non-toxic concentration (100  $\mu$ M, 70  $\mu$ M and 100  $\mu$ M respectively) followed  
213 by infection with SARS-COV-2 (Multiplicity of infection; MOI= 0.1). The treated and virus  
214 infected cells were incubated for 48 h (37 °C, 5% CO<sub>2</sub>) following which the supernatants were  
215 harvested for viral quantification by plaque assay and qRT-PCR.

216

217 **Plaque assay:** For viral quantification, Vero E6 cells were seeded in 96 well plates, followed by  
218 viral inoculation on the next day using dilutions; starting at 1:50 the virus was double diluted till  
219 1:51200. The virus was incubated with the cells for 2 h at 37 °C for viral adsorption. Thereafter,  
220 the media containing the inoculum was removed, and wells were overlaid with 150  $\mu$ L of 1%  
221 carboxymethylcellulose (CMC) prepared in MEM media (containing 10% FBS). The plates were  
222 then incubated at 37 °C for 96 h with 5% CO<sub>2</sub> and 75% humidity. Post incubation, the cells were  
223 fixed with 5% formaldehyde before washing twice with 1 $\times$  PBS and staining was performed  
224 using 0.25% crystal violet (prepared in 30% methanol). Plaques were visualized and counted to  
225 calculate viral titers using the following formula:

226 
$$\text{Plaque forming units (pfu)} = (\text{No. of plaques}) / (\text{Dilution} \times \text{volume of virus})$$

227

228 **qRT-PCR:** To quantify the viral RNA using qRT-PCR, 150  $\mu$ L media from the treated,  
229 untreated and virus infected wells was collected, and used for RNA isolation using the  
230 NucleoSpin Viral RNA isolation kit (740956.250). Isolated RNA samples were then subjected to  
231 One-step qRT-PCR using QuantiTect qRT-PCR kit (Qiagen #1054498) and PIKOREAL 96  
232 Real-Time PCR system (Thermo scientific). Data analysis was performed using a standard curve  
233 to calculate genome equivalents of SARS-CoV-2 in all the samples.

234

235 **References:**

- 236 1 Wu, F. *et al.* A new coronavirus associated with human respiratory disease in China. *Nature* **579**,  
237 265-269, doi:10.1038/s41586-020-2008-3
- 238 10.1038/s41586-020-2008-3 [pii] (2020).
- 239 2 Hilgenfeld, R. From SARS to MERS: crystallographic studies on coronaviral proteases enable  
240 antiviral drug design. *FEBS Journal* **281**, 4085-4096, doi:10.1111/febs.12936 (2014).
- 241 3 Pace, C. N., Vajdos, F., Fee, L., Grimsley, G. & Gray, T. How to measure and predict the molar  
242 absorption coefficient of a protein. *Protein Sci* **4**, 2411-2423, doi:10.1002/pro.5560041120  
243 (1995).
- 244 4 Raran-Kurussi, S. & Waugh, D. S. A dual protease approach for expression and affinity  
245 purification of recombinant proteins. *Anal Biochem* **504**, 30-37, doi:10.1016/j.ab.2016.04.006
- 246 S0003-2697(16)30029-X [pii] (2016).
- 247 5 Kao, R. Y. *et al.* Characterization of SARS-CoV main protease and identification of biologically  
248 active small molecule inhibitors using a continuous fluorescence-based assay. *FEBS Lett* **576**,  
249 325-330, doi:S0014579304011421 [pii]
- 250 10.1016/j.febslet.2004.09.026 (2004).
- 251 6 Kneller, D. W. *et al.* Structural plasticity of SARS-CoV-2 3CL M(pro) active site cavity revealed by  
252 room temperature X-ray crystallography. *Nat Commun* **11**, 3202, doi:10.1038/s41467-020-  
253 16954-7
- 254 10.1038/s41467-020-16954-7 [pii] (2020).
- 255 7 Lausi, A. *et al.* Status of the crystallography beamlines at Elettra. *The European Physical Journal*  
256 *Plus* **130**, 43, doi:10.1140/epjp/i2015-15043-3 (2015).
- 257 8 Vonrhein, C. *et al.* Data processing and analysis with the autoPROC toolbox. *Acta Crystallogr D*  
258 *Biol Crystallogr* **67**, 293-302, doi:10.1107/S0907444911007773
- 259 S0907444911007773 [pii] (2011).
- 260 9 Liebschner, D. *et al.* Macromolecular structure determination using X-rays, neutrons and  
261 electrons: recent developments in Phenix. *Acta Crystallogr D Struct Biol* **75**, 861-877,  
262 doi:10.1107/S2059798319011471
- 263 S2059798319011471 [pii] (2019).
- 264 10 Terwilliger, T. C. *et al.* Iterative model building, structure refinement and density modification  
265 with the PHENIX AutoBuild wizard. *Acta Crystallogr D Biol Crystallogr* **64**, 61-69,  
266 doi:S090744490705024X [pii]
- 267 10.1107/S090744490705024X (2008).
- 268 11 Emsley, P., Lohkamp, B., Scott, W. G. & Cowtan, K. Features and development of Coot. *Acta*  
269 *Crystallogr D Biol Crystallogr* **66**, 486-501, doi:10.1107/S0907444910007493
- 270 S0907444910007493 [pii] (2010).
- 271 12 Buster Version 2.11.2 (2017).
- 272 13 Pettersen, E. F. *et al.* UCSF Chimera--a visualization system for exploratory research and analysis.  
273 *J Comput Chem* **25**, 1605-1612, doi:10.1002/jcc.20084 (2004).
- 274 14 Schrödinger Release 2021-2: Maestro, Schrödinger, LLC. ( 2021).
- 275 15 Phillips, J. C. *et al.* Scalable molecular dynamics with NAMD. *J Comput Chem* **26**, 1781-1802,  
276 doi:10.1002/jcc.20289 (2005).

277 16 Caly, L., Druce, J. D., Catton, M. G., Jans, D. A. & Wagstaff, K. M. The FDA-approved drug  
278 ivermectin inhibits the replication of SARS-CoV-2 in vitro. *Antiviral Res* **178**, 104787, doi:S0166-  
279 3542(20)30201-1 [pii]  
280 10.1016/j.antiviral.2020.104787 (2020).  
281 17 Kalita, P., Padhi, A. K., Zhang, K. Y. J. & Tripathi, T. Design of a peptide-based subunit vaccine  
282 against novel coronavirus SARS-CoV-2. *Microb Pathog* **145**, 104236, doi:S0882-4010(20)30523-4  
283 [pii]  
284 10.1016/j.micpath.2020.104236 (2020).  
285  
286
